# Supplementary material
Source: PubMed Central journal article supplement (PMC9442015)
Supplement: ajcr0012-3693-f8.pdf [file ajcr0012-3693-f8.pdf]

# Cell proliferation in colon cancer

## Homo sapiens chromosome 11, GRCh38.p12 Primary Assembly

NCBI Reference Sequence: NC\_000011.10

### GenBank Graphics

>NC\_000011.10:125624910-125626911 Homo sapiens chromosome 11, GRCh38.p12 Primary Assembly

```
ACTCCTGGCCTCAAGCCATTCTCCTGCCTCGCCTTCCCAAAGTGCTGGAATTACAGGCAGGAGCCACTGCGCCCG
GCCAGTGCTGGAGAATGTAATGGAGATGATCCTGCCTATCCCTGAGTTCAGTCTAGTTTACTGTCTCAGAGAATACTTA
TTCCATTTTTCCTATTTTGTCTTGAGTCTCTTTCCTCAGAATTTACTTTTCCACTTAAATGACGTACGCAGCTTTTA
AATTTGCGTTGTAAGATTTATTTTGGCTCTCCCGCCTGTTCTTTCACATTAATAATGAAAAAGTTTGTAGAACTAA
GCTAAGCAGATGGTCTTCTGCAAAAAGACCGGGCTGAAGTAAAGCATTGTTTTGGAGCTGGTTCACAGAAAAAAA
GGCAAAACTGGTTATCCTGACTTCAAGCTCCAACATAAACTGCTCGCTTCTCCGGGAAACTTGCCCGCCACACA
CACTTGACTGCGTGGCCAGTTCTTTCGAAGCCTCTCGCTCCAACACGGAGTTCCTCCATTTCTTCACAGTCGGC
TCTCAGCAGCTGCTGCTGGTTTTCTCGGCTCCAGCACCACGAGTACCGCACTCTGAGGTTTACAAAGCACTCTGCTT
CACCGACTGTGATCCTCACAGTCTGTCCGGTGGCCTCACGCAGGTGGCGGTGCAGCCTTTCAGGCCCAGAGCG
GCCAGGAGCGAAGCCCGCAGCCCCGCTGGAAGCGCAGCGCGGTTCGGTTCGCGCGCCCCTGAGGCTTGAGAGGC
CTGGGCTTCCCCCAGCAGCGCTCGAGCACCGCCAGTCGAGCCTCACACCGGATGCCACTTCATATTTGGGCCCA
GAGCTCAATTCGCGCCGATGCGGTCCGCCGCTCTTAAATCTCTTCAGCCAGGATCTCTCCCGACTGCAAAGCAG
CCCTGGGCGGGAGCGCAACATCTCCACGTCACCCTTTTGAGCCGCCGACATTCAGAGGGGCAGGACACGGG
AACGCGCGCTGTCTTGCTTTACGGCGCGGGTGCGCGAGTTTGCGGCAGCGTGACGCCCTCAAGTTTTGGCGGG
AAAAGCGCTGCATTTGATTCTGCAGTGGTGGGCAAAGGACAGTCCGGTGAGGAAGGGCGGCCGGTAGAGTAG
GGAAGGTTTCTAAAGAAGGAGTTCGGGGTCTAGATTAGTGAGGGAGGGCATGGTGGGAGAAAGTTAGCATTGACT
AGCGCAGGGGATTGGAGAGACTCCTGCGGAGGGGCGGTTTTCGGAGGGTGGAGGAATGGTACCAGGAGGTTCCC
GTTGTGGGGGCGGGGCGAGGAGGACTAACCCTGCTAGCTAAGAACCCCAAGGAAGAGTCCCAGCCCTTCC
TTTCGCTCTGGGGGCGAGTTTGGCCCCGCCCCGCTTGGGACGGGTGGGGCTGTGGATGGGGATGGGAATT
GGAATTGAGCAATTGGGAGGAGGCGTCCCGCAGGCGTTTTCTGCCCATACCGTCCCTATATCCTCTTCTCTC
TTCCCCAGACCCCCACCTCTCCCTCCTTCCCCAGTCGTTCCGCCGAAAGCATTGTCTCCACCTCTTCATAA
CAACAATTAATTTCTCTGGGGCCTGAGGAGGGCAGAATTTCAACCTTCGGTGTGCTTGGGAGTGGCGATTGTGAT
TTACACGACAAAATGGTCAGGTTTAGAATAGTTGTCGTGTTGAAAGACTTGGATAAATGTGGATGAGATAGAAGG
GGAAGGCAAGAGCTGTTAATTTTCGTGGGCAATCCTGGGAGAGGCGGGGCTCAGTGGCTTCACTGGTGATCTTA
CACTCTACATCTTTTCTGGATTCTGCCTTTTACAGCCGAGGTGCTCGGTGGAGTCATGGCAGTGCCCTTTGTGGA
AGACTGGGACTTGGTGCAAACCCTGGGAGAAGGTGCCTATGGAGAGTGAGTTCTTTTAAGCTTGCCTTCGTTTTCT
GAGTGCATATTCATTGTTTTGGAGTCTCACACTCTGGTGATTTAGAA
```
